1  
2  
3  
4  
5  
6  
7  
8  
9  
10  
11  
12  
13  
14  
15  
16  
17  
18  
19  
20

## **TRAIL (CD253) Sensitizes Human Airway Epithelial Cells to Toxin-Induced Cell Death**

**Yinghui Rong<sup>1</sup>, Jennifer Westfall<sup>1</sup>, Dylan Ehrbar<sup>1</sup>, Timothy LaRocca<sup>2</sup>, and Nicholas J. Mantis<sup>1</sup>**

<sup>1</sup>Division of Infectious Disease, Wadsworth Center, New York State Department of Health, Albany, NY 12208; <sup>2</sup>Department of Basic and Clinical Sciences, Albany College of Pharmacy and Health Sciences, Albany, NY 12208

\*Running title: Ricin-Induced Killing of Airway Epithelial Cells

Correspondence should be addressed to Timothy LaRocca <Timothy.LaRocca@acphs.edu> and Nicholas J Mantis <nicholas.mantis@health.ny.gov>

**Keywords:** toxin; lung; inflammation; cytokine; biodefense

21 **ABSTRACT**

22 Inhalation of ricin toxin is associated with the onset of acute respiratory distress syndrome  
23 (ARDS), characterized by hemorrhage, inflammatory exudates, and tissue edema, as well as the  
24 near complete destruction of the lung epithelium. Here we report that the Calu-3 human airway  
25 epithelial cell line is relatively impervious to the effects of ricin, with little evidence of cell death  
26 even upon exposure to microgram amounts of toxin. However, the addition of exogenous soluble  
27 TNF-Related Apoptosis Inducing Ligand (TRAIL; CD253) dramatically sensitized Calu-3 cells  
28 to ricin-induced apoptosis. Calu-3 cell killing in response to ricin and TRAIL was reduced upon  
29 the addition of caspase-8 and caspase-3/7 inhibitors, but not caspase 9 inhibitors, consistent with  
30 involvement of extrinsic apoptotic pathways in cell death. We employed nCounter Technology  
31 to define the transcriptional response of Calu-3 cells to ricin, TRAIL, and the combination of  
32 ricin plus TRAIL. An array of genes associated with inflammation- and cell death were  
33 significantly up regulated upon treatment with ricin toxin, and further amplified upon addition of  
34 TRAIL. Of particular note was IL-6, whose expression in Calu-3 cells increased 300-fold upon  
35 ricin treatment and more than 750-fold upon ricin and TRAIL treatment. IL-6 secretion by Calu-  
36 3 cells was confirmed by cytometric bead array. Based on these finding, we speculate that the  
37 severe airway epithelial cell damage observed in animal models following ricin exposure is a  
38 result of a positive feedback loop driven by pro-inflammatory cytokines like TRAIL and IL-6.

39

40

## 41 INTRODUCTION

42 NATO's Biomedical Advisory Council recently concluded that ricin ranks at the top of the  
43 list of potential biothreat agents, due in large part to the toxin's extreme potency against  
44 numerous different cell types, as well as its capacity to be disseminated via aerosol<sup>1</sup>. In rodents,  
45 swine, and non-human primates (NHPs), inhalational ricin exposure evokes what is clinically  
46 equivalent to acute respiratory distress syndrome (ARDS)<sup>2-4</sup>. In rodents and NHPs, the lethal  
47 dose 50 (LD<sub>50</sub>) of ricin by aerosol is ~4 µg/kg<sup>5-7</sup>. The hallmarks of ricin-induced lung damage  
48 include early onset of alveolar macrophage apoptosis (6-12 h) followed hours later by intra-  
49 alveolar edema, accumulation of inflammatory cytokines in the BAL, neutrophilic infiltration,  
50 and fibrinous exudate<sup>5, 7-10</sup>. Airway epithelial cells are also a primary target of ricin intoxication  
51 and may play a role in amplifying toxin-induced pathology through secretion of pro-  
52 inflammatory cytokines and chemokines<sup>5, 7, 11, 12</sup>.

53 Ricin itself is a potent inducer of apoptosis<sup>13</sup>. The toxin is derived from castor beans  
54 (*Ricinus communis*) where it accumulates in storage vesicles as a mature, 65 kDa glycosylated  
55 protein<sup>14-16</sup>. Ricin's two subunits, RTA and RTB, are joined by a single disulfide bond. RTB is a  
56 galactose- and N-acetylgalactosamine (Gal/GalNAc)-specific lectin that promotes ricin  
57 attachment to cell surface glycoproteins and glycolipids and facilitates ricin's retrograde  
58 transport to the endoplasmic reticulum (ER). RTA is an RNA N-glycosidase (EC 3.2.2.22) that  
59 catalyzes the hydrolysis of a conserved adenine residue within the sarcin/ricin loop (SRL) of 28S  
60 rRNA<sup>13, 17, 18</sup>. In the ER, RTA is liberated from RTB and is retrotranslocated via the Sec61  
61 complex into the cytoplasm where it inactivates ribosomes with great efficiency<sup>17-19</sup>.  
62 Programmed cell death in alveolar macrophages and primary human bronchial epithelial cells  
63 occurs via caspase-3-dependent mechanisms, although the exact upstream signals (e.g., ribosome  
64 inactivation, ribotoxic stress, MAPK and Nfκb signaling) are yet to be elucidated.

65 The goal of the current study was to better define the response of airway epithelial cells to  
66 the effects of ricin, especially in light of recent quantitative analysis of ribosomal depurination  
67 status that indicated that the pulmonary epithelial cells are disproportionately affected by ricin  
68 following intranasal challenge<sup>11</sup>. Specifically, we reasoned that cells already compromised by  
69 ricin would be hypersensitive to secondary insults such as pro-inflammatory cytokines that are  
70 known to accumulate in the bronchoalveolar lavage (BAL) of animals following a ricin  
71 inhalation, especially the early response cytokines IL-1 and TNF-α<sup>2, 8, 12, 20-24</sup>. TNF-α and

72 related cytokines like TRAIL (tumor necrosis factor-related apoptosis-inducing ligand; CD253)  
73 are particularly suspected as having a role in driving lung epithelial cell death considering their  
74 established capacities to trigger extrinsic apoptotic cell death in different cell types experiencing  
75 intracellular stress from another insult <sup>25</sup>.

76

## 77 **MATERIALS AND METHODS**

78 **Chemicals and biological reagents.** Ricin toxin (Ricin communis agglutinin II) was  
79 purchased from Vector Laboratories (Burlingame, CA). Ricin was dialyzed against PBS at 4°C  
80 in 10,000 MW cutoff Slide-A-Lyzer dialysis cassettes (Pierce, Rockford, IL), prior to use in  
81 cytotoxicity studies. Fetal calf serum was purchased from Gibco-Invitrogen (Carlsbad, CA).  
82 Cells were maintained in a humidified incubator at 37°C with 5% CO<sub>2</sub>. Recombinant human  
83 Tumor Necrosis Factor- $\alpha$  (TNF- $\alpha$ ), recombinant human sTRAIL/Apo2L/CD253, anti-human  
84 sTRAIL-(s)-Apo2L were purchased from Peprotech (Rocky Hill, NJ). Human TNF- $\alpha$   
85 neutralizing rabbit Ab was purchased from Cell Signaling Technology (Danvers, MA). Z-LEHD-  
86 FMK, Z-VAD-FMK, Z-DEVD-FMK, and Z-IETD-FMK were purchased from ApexBio  
87 (Taiwan). Necrostatin-1 (Nec-1), GSK'872, Necrosulfonamide (NSA) were purchased from  
88 EMD Millipore (Burlington, MA). Unless noted otherwise, all other chemicals were obtained  
89 from MilliporeSigma (St.Louis, MO). Murine mAbs against ricin toxin's A subunit (PB10,  
90 SyH7, GD12, and IB2) and B subunit (24B11, SylH3, MH3, 8A1, 8B3, LF1, and LC5) were  
91 purified by Protein A chromatography at the Dana Farber Cancer Institute (DFCI) Monoclonal  
92 Antibody Core facility (Boston, MA).

93

94 **Cell culture.** The human non-small cell lung cancer cell line (Calu-3) was obtained from  
95 American Type Culture Collection (Manassas, VA) and cultured in Eagle's Minimum Essential  
96 Medium (EMEM) supplemented with 10% fetal bovine serum, provided by the Wadsworth  
97 Center Media Services facility. Cells were grown in a humidified incubator containing 5% CO<sub>2</sub>  
98 and 95% air at 37°C. The cells were plated in 75 cm<sup>2</sup> cell culture flasks and subcultured at 70%-  
99 90% confluence using a 0.25% trypsin solution in EDTA (Corning Life Sciences, Corning, NY).  
100 The culture medium was changed every 3 days. The cells were split 1:5 during each passage. The  
101 passages used for the following experiments were under 10.

102

103 **Cytotoxicity assay.** Calu-3 cells were trypsinized, adjusted to  $5 \times 10^5$  cells per ml, and seeded  
104 (100  $\mu$ l/well) into 96-well plates (Corning Life Sciences, Corning, NY), and incubated for 3-4  
105 days until confluence. Calu-3 cells were then treated with ricin, TRAIL, a mixture of ricin and  
106 TRAIL mixture, or medium alone (negative control) for 24 hr. The cells were washed to remove  
107 non-internalized toxin or TRAIL, and were then incubated for 24-72 h. Cell viability was  
108 assessed using CellTiter-GLO reagent (Promega, Madison, WI) and a Spectramax L Microplate  
109 Reader (Molecular Devices, Sunnyvale, CA). All treatments were performed in triplicate and  
110 repeated at least 3 times. 100% viability was defined as the average value obtained from wells in  
111 which cells were treated with medium only.

112

113 Based on cytotoxicity results from the ricin and TRAIL treatment above, ricin (0.25  $\mu$ g/ml) and  
114 TRAIL (0.1  $\mu$ g/ml) were used in all the subsequent experiments. To measure the neutralizing  
115 activity of ricin specific mAbs and neutralizing anti-TRAIL Ab, the mAbs (starting at 15  $\mu$ g/ml)  
116 or anti-TRAIL Ab (starting at 1  $\mu$ g/ml) in 2-fold serial dilution were mixed with ricin and  
117 TRAIL and then administered to the cells seeded in 96-well plates for 24h. After washing and  
118 then incubating for 3 days, cell viability was assessed using CellTiter-GLO reagent. Cell  
119 viability was normalized to cells treated with medium only. The protective effect of caspase  
120 inhibitors (Z-VAD-FMK, Z-LEHD-FMK, Z-DEVD-FMK, Z-IETD-FMK), RIPK1 inhibitor  
121 (Nec-1), RIPK3 inhibitor (GSK'872), and MLKL inhibitor (NSA) was also evaluated when  
122 combined with ricin and TRAIL using concentrations and incubation times as indicated in each  
123 experiment. DMSO was used as a control vehicle for all experiments.

124

125 **Caspase3/7 activity assay.** For the quantification of caspase 3/7 activities after treatment, Calu-3  
126 cells were labeled with 500 nM Cell Event caspase-3/7 green detection reagent (Invitrogen,  
127 Carlsbad, CA) for 30 minutes at 37°C in the dark. A total of 10,000 stained cells per sample were  
128 acquired and analyzed in a FACS-Calibur flow cytometer by using CellQuest Pro software  
129 (Becton Dickinson, Franklin Lakes, NJ). Data were expressed as a percentage of total cells.

130

131 **Multiplex gene expression analysis using NanoString.** Calu-3 cells were treated with ricin,  
132 TRAIL, the combination of ricin and TRAIL, or medium alone (negative control) for 24h. RNA  
133 was extracted from treated or non-treated cells using the RNeasy plus mini kit with additional

134 on-column DNase digestion with the RNase-Free DNase Set (Qiagen Hilden, Germany).  
135 Protocols were followed according to the manufacturer's instructions. Extracted RNA samples  
136 were stored at -80 °C until use. Upon assay, RNA integrity was verified by agarose gel  
137 electrophoresis. RNA quality and concentration were measured using an Agilent 2100  
138 Bioanalyzer (Life Technologies, Carlsbad, CA). RNA (100 ng) was hybridized with a  
139 predesigned nCounter human immunology panel including 594 target genes and 15 internal  
140 reference genes. The geNorm algorithm was used to select the most stable of these reference  
141 genes (GAPDH, PPIA, G6PD, EEF1G, GUSB, HPRT1, SDHA, RPL19) for normalization <sup>26</sup>.  
142 The experimental procedures were carried out on the NanoString preparation station and digital  
143 analyzer according to manufacturer's instructions. Two biological replicates were selected from  
144 each of the four groups for analysis.

145  
146 **Cell supernatant cytokine quantification by cytometric bead array (CBA).** Cell supernatants  
147 were collected from treated Calu-3 cells. The BD CBA Human Inflammatory Cytokines kit  
148 (Becton Dickinson, Franklin Lakes, NJ) was used to quantitatively measure specific sets of  
149 cytokines: interleukin-8 (IL-8), interleukin-1 $\beta$  (IL-1 $\beta$ ), interleukin-6 (IL-6), interleukin-10 (IL-  
150 10), TNF- $\alpha$ , and interleukin-12p70 (IL-12p70). Dilution series of human cytokine standards,  
151 included in the kit and prepared according to the manufacturer's instructions, were included in  
152 each assay run to enable quantification. Assays were performed according to the manufacturer's  
153 instructions: 50  $\mu$ l of assay beads, 50  $\mu$ l of the studied sample or standard and 50  $\mu$ l of PE-  
154 labeled antibodies (Detection Reagent) were added consecutively to each sample tube and then  
155 incubated at room temperature in the dark for 3 h. Next, the samples were washed and  
156 centrifuged after which the pellet was resuspended in Wash Buffer and analyzed on the same day  
157 in a flow cytometer. Flow cytometry was performed using a four-laser BD FACSCalibur™  
158 system utilizing BD CellQuest™ software for acquisition.

159  
160 **Statistical Analyses.** Statistical analyses were carried out using GraphPad Prism 7 (GraphPad  
161 Software, San Diego, CA), as well as the nCounter Advanced analysis module (v 1.1.4) of the  
162 nSolver Analysis software (v3). Differential expression of the genes examined was determined  
163 by multivariate linear regression, with group membership chosen as the predictor variable and  
164 binding density as a confounder. All *p*-values derived from NanoString analysis were adjusted

165 with Benjamini-Yekutieli correction for control of false discovery rate. Low count genes were  
166 omitted using the default settings in the nCounter Advanced analysis software for all analyses  
167 except the linear regression of gene expression values.

168

## 169 RESULTS

170 **TRAIL sensitizes Calu-3 cells to ricin toxin-induced death.** Ricin is a promiscuous toxin  
171 capable of killing virtually all mammalian cell types. In most cases, >50% cell death occurs  
172 within 12-48 h of cells being exposed to nanogram amounts of ricin<sup>27</sup>. We chose Calu-3 cells as  
173 a model to understand the response of human airway epithelial cells to ricin toxin. Calu-3 cells  
174 are a small cell lung adenocarcinoma line widely accepted as a model to study drug and  
175 nanomaterial interactions with pulmonary epithelium<sup>28-32</sup>. Calu-3 cells have also been used as a  
176 model to assess the effects of other biothreat agents, namely botulinum toxin, on cells of the  
177 human airway<sup>33</sup>.

178 To assess the sensitivity of Calu-3 cells to ricin toxin, confluent Calu-3 cells grown in  
179 microtiter plates were treated with a range of ricin toxin doses (>1-10  $\mu\text{g/ml}$ ) and then assessed  
180 for viability 72 h later. We found that Calu-3 cells were largely impervious to the effects of ricin  
181 to the point that we were unable to establish an  $\text{IC}_{50}$  value (**Figure S1**). Calu-3 cell monolayers  
182 grown on Transwell filters were similarly insensitive to ricin toxin (**Figure S2**).

183 We reasoned that pro-inflammatory cytokines like  $\text{TNF-}\alpha$ , which is known to be released by  
184 alveolar macrophages in response to ricin, might sensitize Calu-3 cells to toxin-induced cell  
185 death<sup>8</sup>. TRAIL (Apo2L; CD253) is another pro-inflammatory cytokine of interest, considering  
186 its role in accelerating lung epithelial cell death under conditions of ARDS<sup>34,35</sup>. We examined  
187 the viability of Calu-3 cells following treatment with a fixed amount of ricin (1  $\mu\text{g/ml}$ ) plus  
188 doses of  $\text{TNF-}\alpha$  or TRAIL ranging from 0.01 ng/ml to 1000 ng/ml (**Figure 1A**). Calu-3 cells  
189 treated with this dose of ricin alone displayed ~80% viability at 72h time point. The addition of  
190 10 ng/ml of  $\text{TNF-}\alpha$  resulted in 50-60% cell death, although increasing amounts of the cytokine  
191 did not exacerbate ricin's cytotoxic activity further indicating a level of  $\text{TNF-}\alpha$  saturation. This  
192 is in contrast to TRAIL, which displayed a dose-dependent enhancement of ricin-induced Calu-3  
193 cell death. TRAIL was significantly more potent than  $\text{TNF-}\alpha$  in that virtually 100% cell killing  
194 was observed with  $\geq 100$  ng/ml TRAIL. To better define the degree of synergy between ricin and

195 TRAIL, we performed checkerboard analysis across a range of ricin (0-1  $\mu\text{g/ml}$ ) and TRAIL (0-  
196 1  $\mu\text{g/ml}$ ) concentrations (**Figure 1B**). This analysis identified the minimal doses ricin (250 ng/ml)  
197 and TRAIL (100 ng/ml) required to achieve  $\sim 100\%$  cell death within a 72 h period.

198 A time course of Calu-3 cell viability in response to ricin (250 ng/ml), TRAIL (100 ng/ml) or  
199 the combination of ricin and TRAIL is shown in **Figure 1C**. The viability of ricin-treated Calu-3  
200 cells declined only marginally ( $\sim 25\%$ ) within a 72 h period, while viability of the TRAIL-treated  
201 cells was largely unchanged in that same time frame. In contrast, the viability of Calu-3 cells  
202 treated with the combination of ricin and TRAIL declined in a stepwise manner at 24 h, 48 h and  
203 72 h to  $< 25\%$  cell viability. The observed effects of ricin and TRAIL on Calu-3 cell death was  
204 annulled by anti-human sTRAIL antibodies (**Figure 2A**) or toxin-neutralizing mAbs against  
205 RTA (**Figure 2B**) or RTB (**Figure S3**).

206 It is reported that in macrophage and epithelial cells, ricin triggers the intrinsic apoptotic  
207 pathway through a process dependent on caspase-3/7 activation<sup>13</sup>. We therefore examined  
208 caspase-3/7 activity in Calu-3 cells following treatment with ricin (250 ng/ml), TRAIL (100  
209 ng/ml), or the combination of ricin and TRAIL. At the concentrations employed, neither ricin  
210 nor TRAIL alone was sufficient to induce caspase-3/7 activity in Calu-3 cells (**Figure 3A**).  
211 However, the combination of ricin and TRAIL resulted in a significant increase ( $\sim 4$ -fold) in  
212 caspase-3/7 activity, which was inhibited by Z-DVEVD (**Figure 3A,B**). In a Calu-3 cell  
213 viability assay, ZVAD (pan-caspase inhibitor), ZIETD (caspase-8 inhibitor) and ZDEVD  
214 (caspase-3/7 inhibitor) were each able to partially suppress the cytotoxic effects of ricin and  
215 TRAIL, but only at early time points (**Figure 4**). Blocking the initiator caspase 9 with the  
216 inhibitor LEHD had no effect on Calu-3 cell viability following ricin and TRAIL (**Figure S4**),  
217 nor did treatment with the necrosis inhibitors NSA, GSK, or Nec-1 (**Figure S4**). Collectively,  
218 these results are consistent with ricin and TRAIL treatment activating apoptosis through caspase-  
219 8 and caspase 3/7-dependent pathways.

220 **Transcriptional profiling of Calu-3 cells following ricin and TRAIL treatment.** To better  
221 understand the interaction between ricin and TRAIL, we subjected Calu-3 cells to transcriptional  
222 profiling using a human immunology nCounter array encompassing  $\sim 600$  genes target genes.  
223 RNA was isolated from Calu-3 cells treated with ricin (250 ng/ml), TRAIL (100 ng/ml) or the  
224 combination of ricin and TRAIL for 3 h, 6 h and 18 h. At the 3 and 6 h time points, there were no  
225 significant changes in RNA levels among the target genes represented on the human



226 immunology array when we compared ricin, TRAIL or ricin + TRAIL treatments to medium  
227 control samples (data not shown). By 18 h, the picture was markedly different. Analysis of the  
228 RNA from Calu-3 cells treated with the combination of ricin and TRAIL indicated that there  
229 were ~80 genes whose expression was elevated >2 fold over the untreated controls, which  
230 corresponds to roughly 12% of all the genes on the human immunology nCounter array (**Figure**  
231 **5; Table S1; Figure S5**). Most notable was an increase in IL-6 (~750 fold), followed by other  
232 pro-inflammatory cytokines like IFN- $\beta$  (~120-fold), TNF- $\alpha$  (~120-fold), IL-8 (88-fold) IL-1 $\alpha$   
233 (60-fold), CCL20 (90-fold). Virtually the same transcriptional profile was observed when Calu-3  
234 cells were treated with just ricin, although the magnitude of the response was dampened as  
235 compared to ricin + TRAIL (**Figure 5; Table S1; Figure S5**). TRAIL treatment alone did not  
236 significantly alter Calu-3 gene expression. These results are consistent with TRAIL enhancing  
237 the pro-inflammatory and apoptotic responses of Calu-3 to ricin, rather than inducing parallel or  
238 convergent pro-inflammatory and apoptotic pathways.

239 To validate the transcriptional profiling studies, Calu-3 cells were treated for 24 h with ricin,  
240 TRAIL or the ricin + TRAIL combination, after which culture supernatants were assayed for the  
241 pro-inflammatory cytokines IL-6, IL-8, IL-1, IL-10, TNF-, and IL-12 levels by CBA. We found  
242 that IL-8, IL-1, IL-10, TNF- $\alpha$ , and IL-12 levels were unchanged, irrespective of whether Calu-3  
243 cells were treated with ricin, TRAIL, or the ricin + TRAIL combination (**Figure 6**). IL-6 levels,  
244 in contrast, were elevated >10 fold in supernatants from Calu-3 cells treated with ricin + TRAIL,  
245 as compared to controls (**Figure 6**). Treatment of cells with ricin alone enhanced IL-6 levels,  
246 although not to a degree that was statistically significant. Thus, IL-6 expression was optimally  
247 induced by ricin + TRAIL, whereas levels of IL-8, IL-1, IL-10, TNF- $\alpha$ , and IL-12 were  
248 unchanged under these conditions even though corresponding mRNA levels were significantly  
249 enhanced, according to nCounter analysis.

250 We postulated that the absence of TNF- $\alpha$  in the Calu-3 cells supernatants following ricin and  
251 TRAIL treatments might be due to autocrine signaling such that soluble cytokine is rapidly  
252 captured by TNF- $\alpha$  receptor, which in turn might contribute to ricin-induced cell death. To  
253 examine this possibility, Calu-3 cells were treated with ricin plus TRAIL in the presence of  
254 neutralizing anti-TNF- $\alpha$  antibody. We found that anti-TNF- $\alpha$  antibody treatment did not prevent  
255 or even reduce Calu-3 cell killing in response to ricin plus TRAIL, whereas treatment with an  
256 anti-TRAIL neutralizing antibody did rescue the cells (**Figure S6**).

257

## 258 **DISCUSSION**

259 Widespread damage to the airway epithelium is a hallmark of inhalational ricin exposure,  
260 although the exact molecular events that culminate in epithelial cell destruction have not been  
261 fully elucidated<sup>2, 3, 5, 7, 24, 36</sup>. In this report we utilized the well-characterized Calu-3 cell line as a  
262 prototype to better define the response of human airway epithelial cells to ricin<sup>28-32</sup>. We found  
263 that Calu-3 cells, when grown to confluence on solid or permeable substrates, were largely  
264 impervious to the effects of ricin. However, co-administration of soluble TRAIL (and to a lesser  
265 degree TNF- $\alpha$ ) rendered Calu-3 cells >1,000-fold more sensitive to toxin-induced apoptosis, as  
266 determined at 48 h and 72 h time points. At early time points, soluble TRAIL magnified the pro-  
267 inflammatory transcriptional response of Calu-3 cells to ricin, as evidenced by an across the  
268 board up regulation of genes encoding cytokines and chemokines like IL-6, TNF- $\alpha$ , IL-8,  
269 CCL20, and IL-1 $\alpha$ . While the current investigation is limited to *in vitro* studies, the results are  
270 consistent with a model in which pro-inflammatory cytokines like TRAIL amplify epithelial  
271 stress-induced signal transduction pathways involved in recruitment of PMNs to the lung mucosa  
272 and, simultaneously, lowering the threshold level of ricin required to induce epithelial apoptosis.

273 TRAIL has previously been implicated in driving respiratory pathology and airway epithelial  
274 cell death in mice and humans in response to pathogenic agents, notably influenza virus,  
275 respiratory syncytial virus (RSV), and chlamydia<sup>34, 35, 37-39</sup>. In the case of influenza virus  
276 infection, alveolar macrophages are the primary source of TRAIL<sup>34, 35</sup>. Bronchial epithelial cells  
277 express TRAIL receptor(s), which ultimately modulate TRAIL-dependent apoptosis. In rodents  
278 and non-human primates, alveolar macrophages are a primary target of ricin following intranasal  
279 and inhalational challenge, so it is plausible that these cells also serve as a source of TRAIL  
280 following toxin exposure<sup>3, 5, 9, 40</sup>. The availability of TRAIL neutralizing antibodies and TRAIL  
281 knock out mice will enable us to sort out the relative contribution of this cytokine to ricin-  
282 induced airway inflammation *in vivo*<sup>34</sup>.

283 The issue of how TRAIL sensitizes Calu-3 cells to ricin-induced cell death is of particular  
284 interest, considering that TRAIL activates cell death through an extrinsic apoptotic pathway,  
285 while ricin triggers intrinsic pathways induced as a result of the ribotoxic stress response (RSR),  
286 unfolded protein response (UPR) and/or increased levels of intracellular calcium<sup>13, 25</sup>. We  
287 postulate that caspase-3 serves as the central node through which ricin and TRAIL intersect. In

288 human cells, activation of TRAIL receptor 1 (TRAIL-R1) and/or receptor 2 (TRAIL-R2)  
289 stimulates caspase 8 activation, which in turn triggers caspase-3<sup>41</sup>. Ricin-induced programmed  
290 cell death is also dependent on caspase-3 activation, although which specific upstream signaling  
291 pathway(s) (*e.g.*, RSR, UPR, ER stress) is most relevant in airway epithelial cell killing have not  
292 been completely elucidated<sup>2, 12</sup>. As demonstrated in this study, Calu-3 cell death following with  
293 ricin and TRAIL treatment coincided with an increase in caspase-3/7 activity and was partially  
294 inhibited by the addition of Z-DEVD-fmk, but not impacted by LEHD, an inhibitor of caspase 9.  
295 Calu-3 cell death may also be exacerbated by a concomitant decline in endogenous inhibitors of  
296 apoptosis such as cFLIP, due to ricin's capacity to arrest protein synthesis, as reported in the case  
297 of cells treated with Shiga toxin<sup>42</sup>. In fact, the protein synthesis inhibitor cycloheximide is  
298 commonly used as a tool to sensitize cells to TRAIL-induced apoptosis<sup>25, 43</sup>. While somewhat a  
299 question of semantics, we would argue that TRAIL sensitizes Calu-3 cells to ricin-induced  
300 apoptosis, rather than ricin-sensitizing Calu-3 cells to TRAIL-induced cell death. This claim is  
301 best supported by transcriptional profiling we performed which demonstrated that TRAIL  
302 amplifies across the board the effects of ricin on the treatment of Calu-3 cells. Treatment with  
303 TRAIL alone had no effect on Calu-3 gene expression, nor did TRAIL (by itself) negatively  
304 influence Calu-3 cell viability.

305 We identified IL-6 as being markedly up regulated in Calu-3 cells at the transcriptional and  
306 protein levels following ricin and ricin plus TRAIL treatments. This finding may have important  
307 implications for understanding the pathology associated with pulmonary ricin exposure,  
308 especially in non-human primates where elevated levels of IL-6 in bronchoalveolar lavage  
309 (BAL) fluids are associated with negative outcomes following toxin exposure (C. Roy, Y. Rong,  
310 D. Ehrbar, N. Mantis, manuscript in preparation). IL-6 also accumulates in BAL fluids and  
311 serum of mice following intranasal ricin challenge (Y. Rong and N. Mantis, manuscript in  
312 preparation)<sup>9, 22, 40, 44</sup>. Whether IL-6 is more than just a biomarker of ricin intoxication remains  
313 to be determined, but there is considerable evidence to implicate this cytokine in driving local  
314 and systemic pathologies<sup>45, 46</sup>. Surprisingly, Calu-3 cells did not secrete detectable levels of  
315 other "initiator" cytokines TNF- $\alpha$  and IL-1, or the chemokine IL-8, even though each of their  
316 respective mRNA transcripts were significantly unregulated by ricin or ricin plus TRAIL. Wong  
317 et al noted that TNF- $\alpha$  secretion actually declined when primary human bronchial epithelial cells  
318 were exposed to ricin, presumably due to a global arrest in protein synthesis<sup>12</sup>. The continued

319 (and possibly preferential) synthesis of IL-6, not TNF- $\alpha$ , in ricin intoxicated cells may have to do  
320 with differential rates of mRNA stability, especially when mitogen-activated protein kinase  
321 (MAPK) signaling pathways are activated<sup>47</sup>. It is worth noting that Wong and colleagues  
322 reported that in primary human bronchial epithelial cells TNF- $\alpha$  and IL-1 $\beta$  expression in  
323 response to ricin is dependent on Nf $\kappa$ B, but IL-6 is not<sup>12</sup>.

324

## 325 **ACKNOWLEDGEMENTS**

326 We gratefully acknowledge Dr. Renjie Song in the Wadsworth Center's Biochemistry and  
327 Immunology Core facility for assisting and for the use of the flow cytometer. We thank Navjot  
328 Singh and Susan L McHale the Wadsworth Center's Applied Genomics Technologies Core for  
329 assistance with the nCounter instrumentation. We also thank Amanda Poon (University at  
330 Albany) for helpful discussions. This work was supported by Contract No.  
331 HHSN272201400021C from the National Institutes of Allergy and Infectious Diseases, National  
332 Institutes of Health. The content is solely the responsibility of the authors and does not  
333 necessarily represent the official views of the National Institutes of Health. The funders had no  
334 role in study design, data collection and analysis, decision to publish, or preparation of the  
335 manuscript. The nCounter experiments were funded by the Director's Office of at the  
336 Wadsworth Center in support of collaborations between the Wadsworth Center and ACPHS.

337

## 338 **REFERENCES CITED**

339

340

- 341 1. Cieslak TJ, Kortepeter MG, Wojtyk RJ, Jansen HJ, Reyes RA, Smith JO, et al. Beyond the  
342 Dirty Dozen: A Proposed Methodology for Assessing Future Bioweapon Threats. *Mil Med*  
343 2018; 183:e59-e65.
- 344 2. Gal Y, Mazor O, Falach R, Sapoznikov A, Kronman C, Sabo T. Treatments for Pulmonary  
345 Ricin Intoxication: Current Aspects and Future Prospects. *Toxins (Basel)* 2017; 9.
- 346 3. Pincus SH, Bhaskaran M, Brey RN, 3rd, Didier PJ, Doyle-Meyers LA, Roy CJ. Clinical and  
347 Pathological Findings Associated with Aerosol Exposure of Macaques to Ricin Toxin. *Toxins*  
348 (Basel) 2015; 7:2121-33.

- 349 4. Thompson BT, Chambers RC, Liu KD. Acute Respiratory Distress Syndrome. *N Engl J Med*  
350 2017; 377:562-72.
- 351 5. Brown RF, White DE. Ultrastructure of rat lung following inhalation of ricin aerosol. *Int J*  
352 *Exp Pathol* 1997; 78:267-76.
- 353 6. Roy CJ, Song K, Sivasubramani SK, Gardner DJ, Pincus SH. Animal Models of Ricin  
354 Toxicosis. *Curr Top Microbiol Immunol* 2012.
- 355 7. Smallshaw JE, Richardson JA, Vitetta ES. RiVax, a recombinant ricin subunit vaccine,  
356 protects mice against ricin delivered by gavage or aerosol. *Vaccine* 2007; 25:7459-69.
- 357 8. Korcheva V, Wong J, Lindauer M, Jacoby DB, Iordanov MS, Magun B. Role of apoptotic  
358 signaling pathways in regulation of inflammatory responses to ricin in primary murine  
359 macrophages. *Mol Immunol* 2007; 44:2761-71.
- 360 9. Lindauer ML, Wong J, Iwakura Y, Magun BE. Pulmonary inflammation triggered by ricin  
361 toxin requires macrophages and IL-1 signaling. *J Immunol* 2009; 183:1419-26.
- 362 10. Roy CJ, Brey RN, Mantis NJ, Mapes K, Pop IV, Pop LM, et al. Thermostable ricin  
363 vaccine protects rhesus macaques against aerosolized ricin: Epitope-specific neutralizing  
364 antibodies correlate with protection. *Proc Natl Acad Sci U S A* 2015; 112:3782-7.
- 365 11. Falach R, Sapoznikov A, Gal Y, Israeli O, Leitner M, Seliger N, et al. Quantitative  
366 profiling of the in vivo enzymatic activity of ricin reveals disparate depurination of different  
367 pulmonary cell types. *Toxicol Lett* 2016; 258:11-9.
- 368 12. Wong J, Korcheva V, Jacoby DB, Magun B. Intrapulmonary delivery of ricin at high  
369 dosage triggers a systemic inflammatory response and glomerular damage. *Am J Pathol* 2007;  
370 170:1497-510.
- 371 13. Tesh VL. The induction of apoptosis by Shiga toxins and ricin. *Curr Top Microbiol*  
372 *Immunol* 2012; 357:137-78.
- 373 14. Lamb FI, Roberts LM, Lord JM. Nucleotide sequence of cloned cDNA coding for  
374 preproricin. *Eur J Biochem* 1985; 148:265-70.
- 375 15. Lord JM. Precursors of ricin and *Ricinus communis* agglutinin. Glycosylation and  
376 processing during synthesis and intracellular transport. *Eur J Biochem* 1985; 146:411-6.
- 377 16. Jolliffe NA, Craddock CP, Frigerio L. Pathways for protein transport to seed storage  
378 vacuoles. *Biochem Soc Trans* 2005; 33:1016-8.

- 379 17. Endo Y, Mitsui K, Motizuki M, Tsurugi K. The mechanism of action of ricin and related  
380 toxic lectins on eukaryotic ribosomes. The site and the characteristics of the modification in  
381 28 S ribosomal RNA caused by the toxins. *J Biol Chem* 1987; 262:5908-12.
- 382 18. Endo Y, Tsurugi K. RNA N-glycosidase activity of ricin A-chain. Mechanism of action  
383 of the toxic lectin ricin on eukaryotic ribosomes. *J Biol Chem* 1987; 262:8128-30.
- 384 19. Spooner RA, Lord JM. Ricin trafficking in cells. *Toxins (Basel)* 2015; 7:49-65.
- 385 20. DaSilva L, Cote D, Roy C, Martinez M, Duniho S, Pitt ML, et al. Pulmonary gene  
386 expression profiling of inhaled ricin. *Toxicon* 2003; 41:813-22.
- 387 21. David J, Wilkinson LJ, Griffiths GD. Inflammatory gene expression in response to sub-  
388 lethal ricin exposure in Balb/c mice. *Toxicology* 2009; 264:119-30.
- 389 22. Gal Y, Mazor O, Alcalay R, Seliger N, Aftalion M, Sapoznikov A, et al.  
390 Antibody/doxycycline combined therapy for pulmonary ricinosis: Attenuation of  
391 inflammation improves survival of ricin-intoxicated mice. *Toxicol Rep* 2014; 1:496-504.
- 392 23. Lindauer M, Wong J, Magun B. Ricin Toxin Activates the NALP3 Inflammasome.  
393 *Toxins (Basel)* 2010; 2:1500-14.
- 394 24. Wong J, Magun BE, Wood LJ. Lung inflammation caused by inhaled toxicants: a review.  
395 *Int J Chron Obstruct Pulmon Dis* 2016; 11:1391-401.
- 396 25. Spencer SL, Sorger PK. Measuring and modeling apoptosis in single cells. *Cell* 2011;  
397 144:926-39.
- 398 26. Vandesompele J, De Preter K, Pattyn F, Poppe B, Van Roy N, De Paepe A, et al.  
399 Accurate normalization of real-time quantitative RT-PCR data by geometric averaging of  
400 multiple internal control genes. *Genome Biol* 2002; 3:RESEARCH0034.
- 401 27. Sandvig K, Olsnes S, Pihl A. Kinetics of binding of the toxic lectins abrin and ricin to  
402 surface receptors of human cells. *J Biol Chem* 1976; 251:3977-84.
- 403 28. Forbes B, Ehrhardt C. Human respiratory epithelial cell culture for drug delivery  
404 applications. *Eur J Pharm Biopharm* 2005; 60:193-205.
- 405 29. Grainger CI, Greenwell LL, Lockley DJ, Martin GP, Forbes B. Culture of Calu-3 cells at  
406 the air interface provides a representative model of the airway epithelial barrier. *Pharm Res*  
407 2006; 23:1482-90.

- 408 30. Hittinger M, Juntke J, Kletting S, Schneider-Daum N, de Souza Carvalho C, Lehr CM.  
409 Preclinical safety and efficacy models for pulmonary drug delivery of antimicrobials with  
410 focus on in vitro models. *Adv Drug Deliv Rev* 2015; 85:44-56.
- 411 31. Ong HX, Traini D, Young PM. Pharmaceutical applications of the Calu-3 lung epithelia  
412 cell line. *Expert Opin Drug Deliv* 2013; 10:1287-302.
- 413 32. Shan J, Huang J, Liao J, Robert R, Hanrahan JW. Anion secretion by a model epithelium:  
414 more lessons from Calu-3. *Acta Physiol (Oxf)* 2011; 202:523-31.
- 415 33. Park JB, Simpson LL. Inhalational poisoning by botulinum toxin and inhalation  
416 vaccination with its heavy-chain component. *Infect Immun* 2003; 71:1147-54.
- 417 34. Herold S, Steinmueller M, von Wulffen W, Cakarova L, Pinto R, Pleschka S, et al. Lung  
418 epithelial apoptosis in influenza virus pneumonia: the role of macrophage-expressed TNF-  
419 related apoptosis-inducing ligand. *J Exp Med* 2008; 205:3065-77.
- 420 35. Peteranderl C, Morales-Nebreda L, Selvakumar B, Lecuona E, Vadasz I, Morty RE, et al.  
421 Macrophage-epithelial paracrine crosstalk inhibits lung edema clearance during influenza  
422 infection. *J Clin Invest* 2016; 126:1566-80.
- 423 36. Wong J, Korcheva V, Jacoby DB, Magun BE. Proinflammatory responses of human  
424 airway cells to ricin involve stress-activated protein kinases and NF-kappaB. *Am J Physiol*  
425 *Lung Cell Mol Physiol* 2007; 293:L1385-94.
- 426 37. Bem RA, Bos AP, Wosten-van Asperen RM, Bruijn M, Lutter R, Sprick MR, et al.  
427 Potential role of soluble TRAIL in epithelial injury in children with severe RSV infection. *Am*  
428 *J Respir Cell Mol Biol* 2010; 42:697-705.
- 429 38. Kotelkin A, Prikhod'ko EA, Cohen JI, Collins PL, Bukreyev A. Respiratory syncytial  
430 virus infection sensitizes cells to apoptosis mediated by tumor necrosis factor-related  
431 apoptosis-inducing ligand. *J Virol* 2003; 77:9156-72.
- 432 39. Starkey MR, Nguyen DH, Essilfie AT, Kim RY, Hatchwell LM, Collison AM, et al.  
433 Tumor necrosis factor-related apoptosis-inducing ligand translates neonatal respiratory  
434 infection into chronic lung disease. *Mucosal Immunol* 2014; 7:478-88.
- 435 40. Sabo T, Gal Y, Elhanany E, Sapoznikov A, Falach R, Mazor O, et al. Antibody treatment  
436 against pulmonary exposure to abrin confers significantly higher levels of protection than  
437 treatment against ricin intoxication. *Toxicol Lett* 2015; 237:72-8.

- 438 41. von Karstedt S, Montinaro A, Walczak H. Exploring the TRAILs less travelled: TRAIL  
439 in cancer biology and therapy. *Nat Rev Cancer* 2017; 17:352-66.
- 440 42. Hattori T, Watanabe-Takahashi M, Ohoka N, Hamabata T, Furukawa K, Nishikawa K, et  
441 al. Proteasome inhibitors prevent cell death and prolong survival of mice challenged by Shiga  
442 toxin. *FEBS Open Bio* 2015; 5:605-14.
- 443 43. Wang L, Du F, Wang X. TNF-alpha induces two distinct caspase-8 activation pathways.  
444 *Cell* 2008; 133:693-703.
- 445 44. Korcheva V, Wong J, Corless C, Iordanov M, Magun B. Administration of ricin induces  
446 a severe inflammatory response via nonredundant stimulation of ERK, JNK, and P38 MAPK  
447 and provides a mouse model of hemolytic uremic syndrome. *Am J Pathol* 2005; 166:323-39.
- 448 45. Kishimoto T. IL-6: from its discovery to clinical applications. *Int Immunol* 2010; 22:347-  
449 52.
- 450 46. Rincon M, Irvin CG. Role of IL-6 in asthma and other inflammatory pulmonary diseases.  
451 *Int J Biol Sci* 2012; 8:1281-90.
- 452 47. Schoenberg DR, Maquat LE. Regulation of cytoplasmic mRNA decay. *Nat Rev Genet*  
453 2012; 13:246-59.
- 454



455

## 456 **FIGURE LEGENDS**

457 **Figure 1. The sensitizing effect of TRAIL on ricin-induced cell death in Calu-3 cells** (A) the  
458 TNF- $\alpha$  or TRAIL (starting at 1  $\mu\text{g/ml}$ ) in 10-fold serial dilution were mixed with ricin (1  $\mu\text{g/ml}$ )  
459 and then administrated to the cells seeded in 96-well plates for 24h. The cells were then washed  
460 and cell viability was measured 72h later, as described in material and methods. (B) In the dose  
461 experiment, cell viability was assessed at 72h after exposure to the indicated concentrations of  
462 ricin and TRAIL. (C) In time-course experiments, cell viability was assessed 24h, 48h, or 72h  
463 after cells exposed to ricin (0.25  $\mu\text{g/ml}$ ) and TRAIL (0.1  $\mu\text{g/ml}$ ). All treatments were performed in  
464 triplicate and repeated for 3 times. 100% viability was defined as the average value obtained  
465 from wells in which cells were treated with medium only.

466 **Figure 2. Specificity of ricin and TRAIL in inducing Calu-3 cell death.** (A) anti-TRAIL ab  
467 (starting at 1  $\mu\text{g/ml}$ ) or (B) anti-ricin mAbs (starting at 15  $\mu\text{g/ml}$ ) in 2-fold serial dilution were  
468 mixed with ricin (0.25  $\mu\text{g/ml}$ ) and TRAIL (0.1  $\mu\text{g/ml}$ ) and then administrated to the cells seeded  
469 in 96-well plates for 24h. The cells were then washed and cell viability was measured 72h later,  
470 as described in material and methods. The results (mean $\pm$ SD) represent a single experiment done  
471 in triplicate and repeated at least three times.

472 **Figure 3. Increased caspase3/7 activity in ricin and TRAIL treated Calu-3 cells.** For the  
473 quantification of caspase 3/7 activity, Calu-3 cells were treated with ricin (0.25  $\mu\text{g/ml}$ ), TRAIL  
474 (0.1  $\mu\text{g/ml}$ ), the mixture of ricin and TRAIL for 24h, or medium only (negative control). the  
475 caspase3/7 activity were determined by flow cytometry as described in material and methods.  
476 Caspase3/7 activity was expressed as a percentage of total cells. The results are presented as the  
477 mean $\pm$ SD of three independent experiments. \*  $p < 0.01$  versus control cells.

478

479 **Figure 4. Protective effect of caspase inhibitors on cell viability in ricin and TRAIL treated**  
480 **Calu-3 cells.** Pan-caspase inhibitor Z-VAD-FMK, Caspase 3 inhibitor Z-DEVD-FMK, or  
481 Caspase 8 inhibitor Z-IETD-FMK at 62.5nM were mixed with ricin (0.25  $\mu\text{g/ml}$ ) and TRAIL  
482 (0.1  $\mu\text{g/ml}$ ) and were administrated to the cells for 24h. The cells were then washed and cell

483 viability was measured 48h or 72h later. The results (mean±SD) represent a single experiment  
484 done in triplicate and repeated at least three times.

485

486 **Figure 5. Nano-string analysis of genes differentially expressed in ricin and TRAIL treated**  
487 **Calu-3 cells.** Calu-3 cells were treated with ricin (0.25µg/ml), TRAIL (0.1µg/ml), the mixture of  
488 ricin and TRAIL, or medium only (negative control) for 18h. RNA was extracted and subjected  
489 to nCounter analysis using the Human Immunology array panel. **(A)** Volcano plot representation  
490 of gene expression changes in ricin + TRAIL treated cells, compared with control cells. Red  
491 circles represent transcripts up-regulated >32-fold ( $5 \log^2$ ). The vertical dashed red line marks  
492 the  $5 \log^2$  fold change threshold. **(B)** Heat map showing the relative fold change of selected  
493 genes in each treatment group compared to control. Genes were selected based on a minimum  
494 4-fold ( $2 \log^2$ ) higher expression between control and ricin + TRAIL treated cells. The color  
495 scale bar denotes maximum counts in **blue** and minimal counts in **white**. Actual fold changes  
496 (relative to control cells) are shown in **Table S1**.

497

498 **Figure 6. Cytokine secretion by Calu-3 cells following ricin and TRAIL treatment.** Calu-3  
499 cells were treated with ricin (0.25 µg/ml), TRAIL (0.1 µg/ml), the mixture of ricin and TRAIL,  
500 or medium only (negative control) for 24h. Cell supernatants were collected from treated cells.  
501 The levels of cytokine IL-8, IL-1β, IL-6, IL-10, TNFα, and IL-12p70 (A-F, respectively) were  
502 measured by CBA. The results are presented as the mean±SD of three independent experiments.  
503 \* p<0.01 vs. untreated cells (negative control).

504

Figure 1

A.

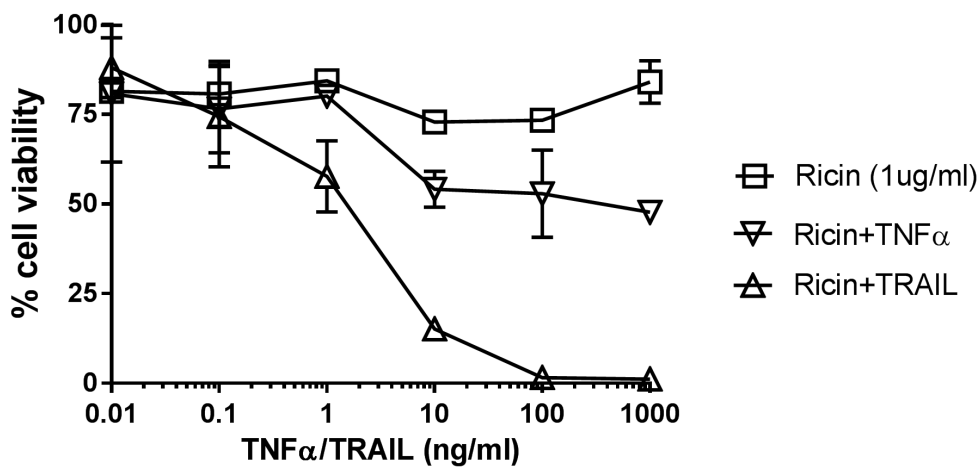

B.

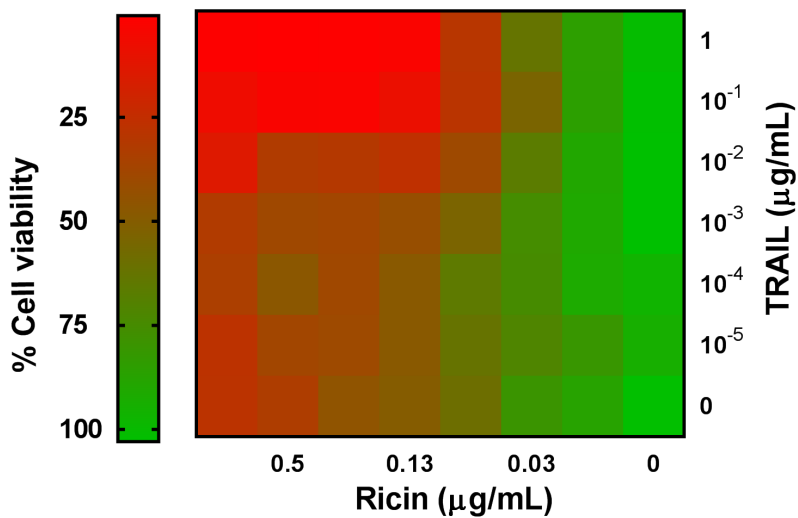

C.

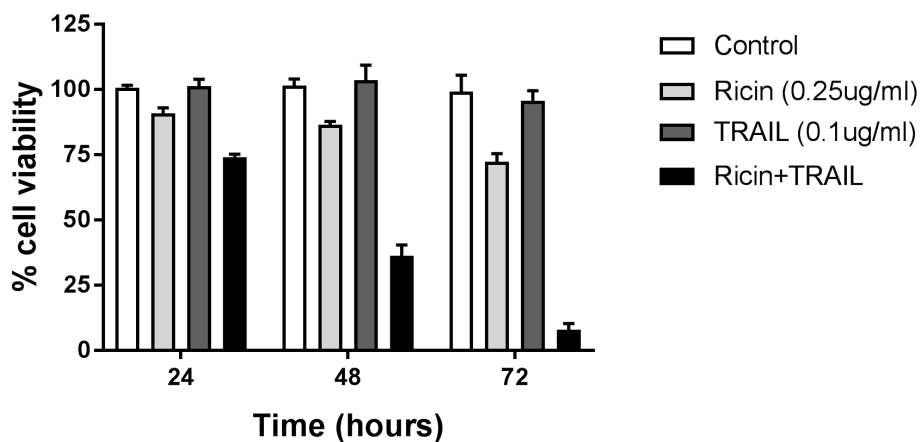

Figure 2

A.

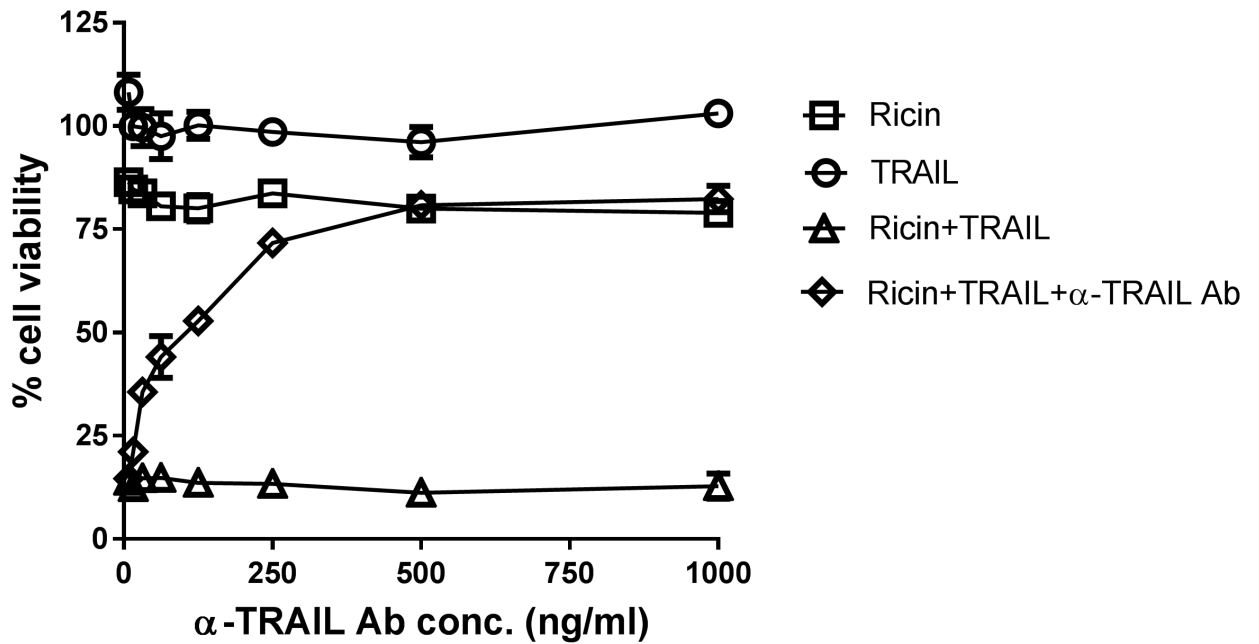

B.

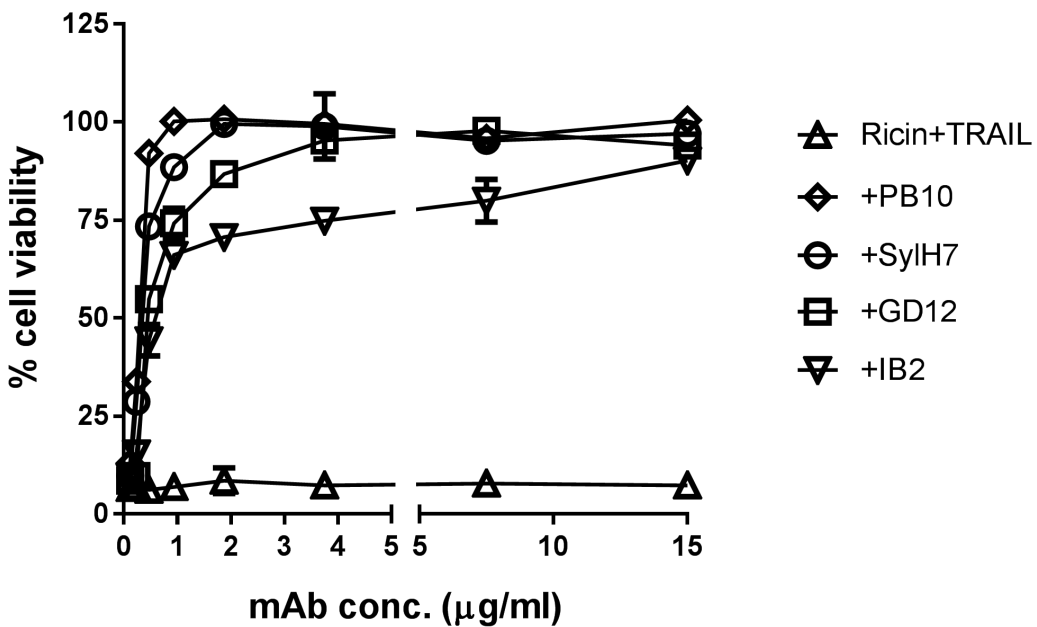

Figure 3

A.

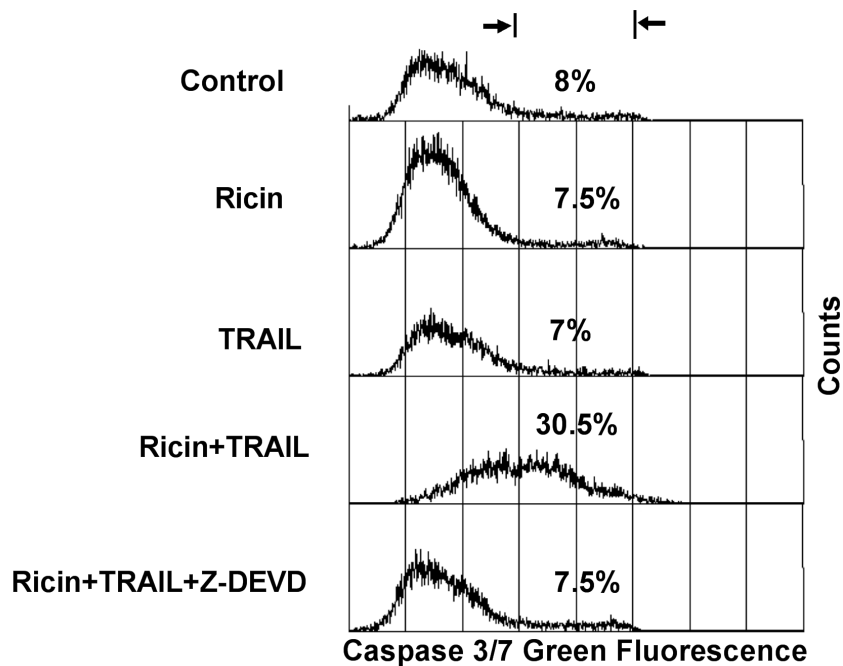

B.

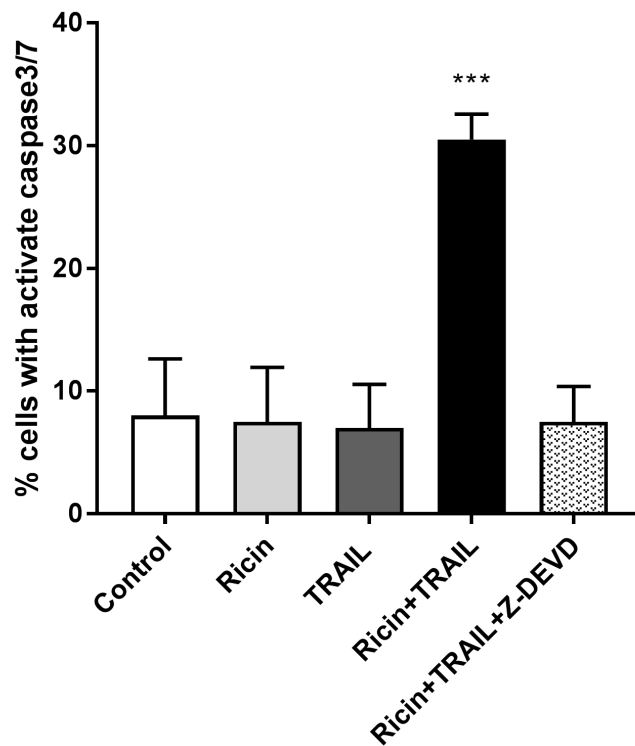

**Figure 4**

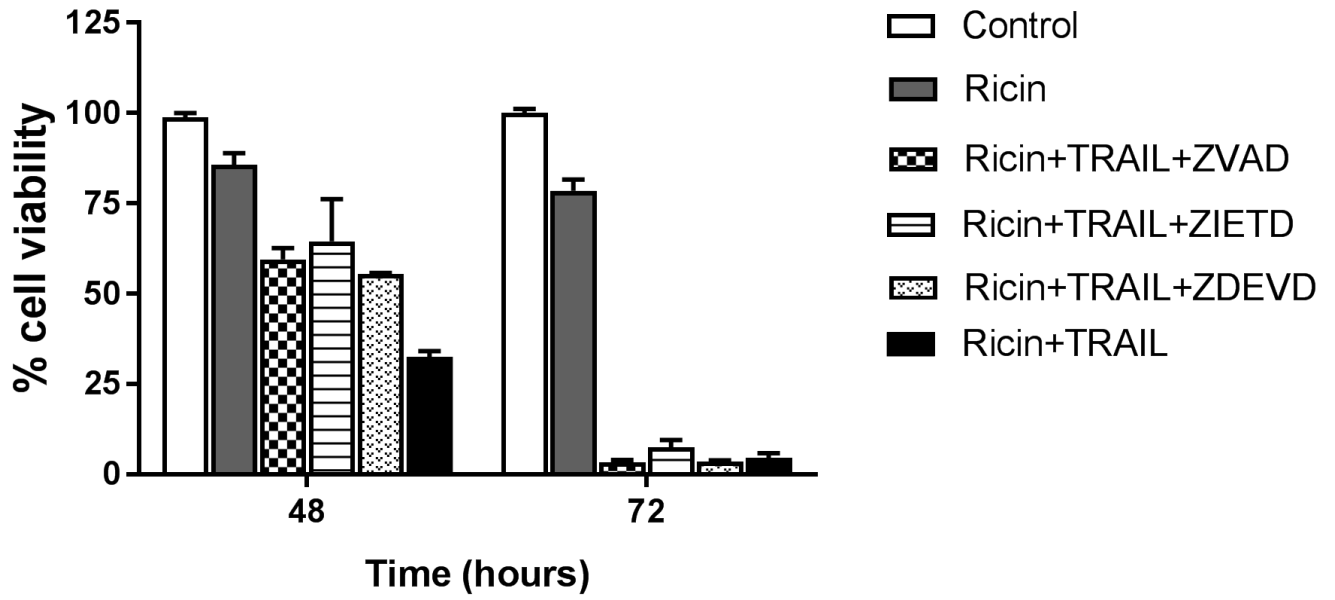

A

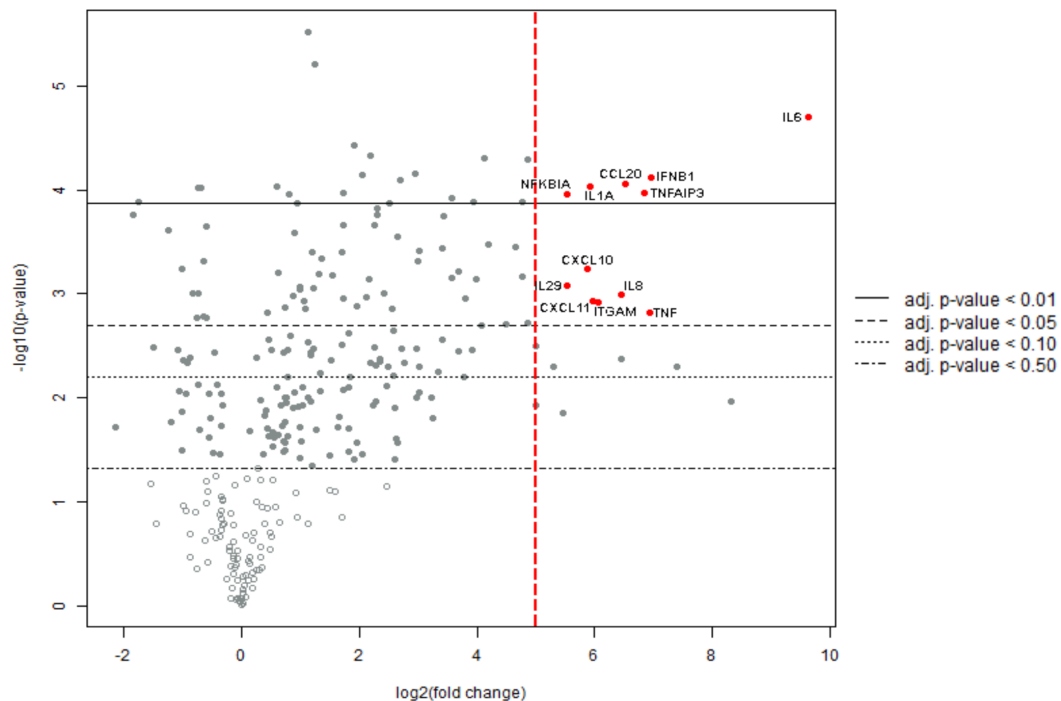

B

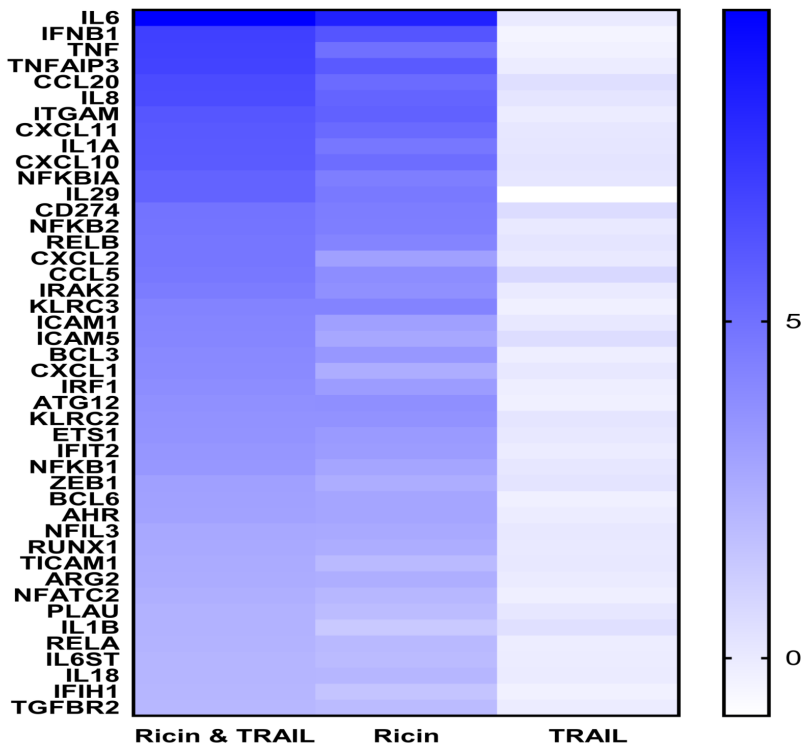

Figure 6

**A. IL-6**

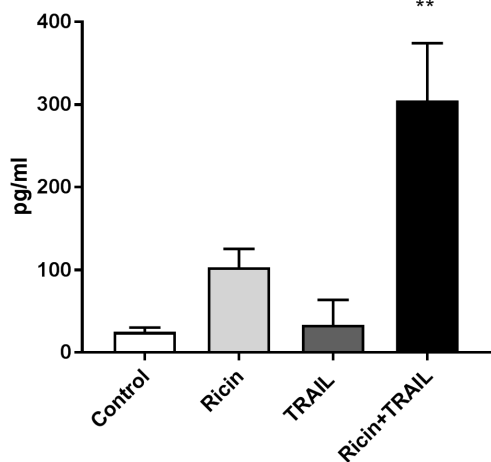

**B. IL-8**

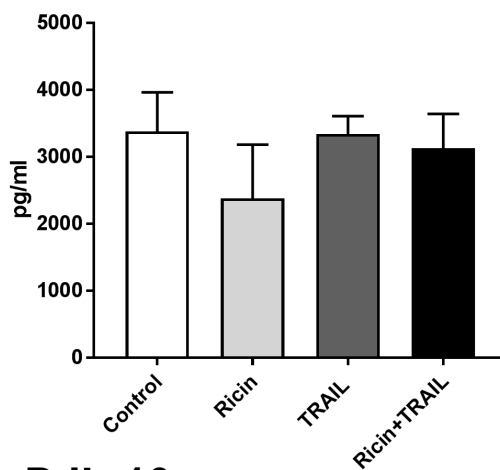

**C. IL-1**

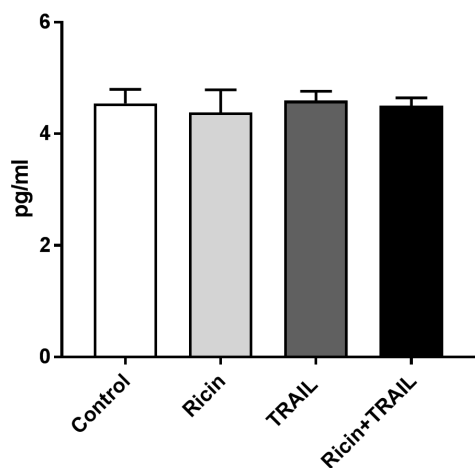

**D. IL-10**

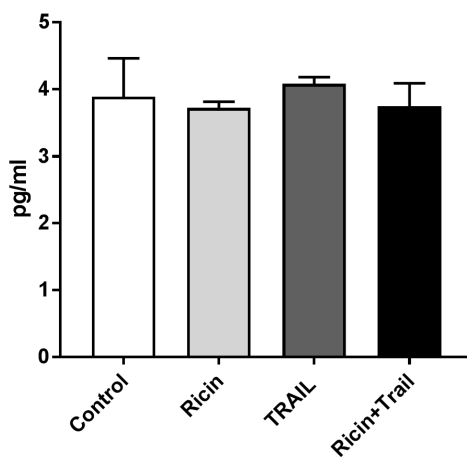

**E. TNF- $\alpha$**

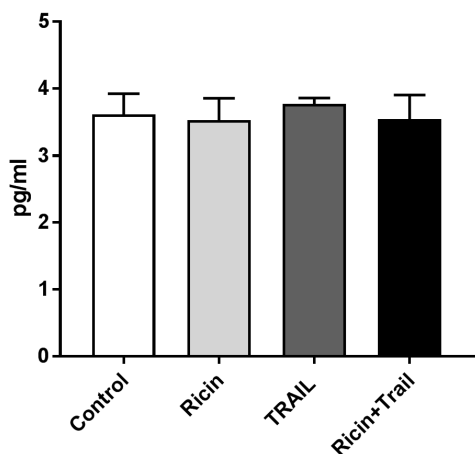

**F. IL-12**

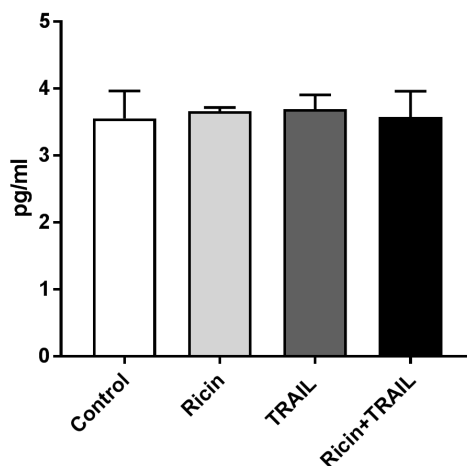

Source: https://www.biorxiv.org/content/10.1101/322479v1.full.pdf
